# Supplementary material for: Integrated Adsorption–Photodegradation of Organic Pollutants by Carbon Xerogel/Titania Composites
Source: MDPI journal article supplement (doi:10.3390/molecules27238483), 2022-12-02
Supplement: s1 [file s1]

# Integrated Adsorption-Photodegradation of Organic Pollutants by Combined Photoactive Carbon Xerogel/Titania adsorbent

Anam Safri <sup>1</sup>, Ashleigh Jane Fletcher <sup>1\*</sup>, Ramsha Safri<sup>2</sup>, and Hifza Rasheed<sup>3</sup>

<sup>1</sup> Department of Chemical and Process Engineering, University of Strathclyde, Glasgow G1 1XJ, UK

<sup>2</sup> The Shaheed Zulfiqar Ali Bhutto Medical University Islamabad, Pakistan

<sup>3</sup> Pakistan Council of Research in Water Resources (PCRWR), Islamabad, Pakistan

\* Correspondence: ashleigh.fletcher@strath.ac.uk; Tel.: +44-141-5482-431

## Supplementary information

**Table S1.** Parameters calculated from piecewise linear fittings to Intra-particle diffusion model, corresponding to Figure 7.

| Concentration mg L <sup>-1</sup> | Stage 1 | Stage 2 | Stage 3 |
|----------------------------------|---------|---------|---------|
| 50                               |         |         |         |
| C                                | 3.93    | 75.9    | 104     |
| k <sub>ip1</sub>                 | 21.3    | 4.36    | 0.872   |
| R <sup>2</sup>                   | 0.950   | 0.978   | 0.971   |
| 100                              |         |         |         |
| Intercept                        | 4.22    | 145     | 207     |
| k <sub>ip 2</sub>                | 45.9    | 7.36    | 0.953   |
| R <sup>2</sup>                   | 0.943   | 0.791   | 0.956   |
| 150                              |         |         |         |
| C                                | 10.7    | 139     | 210     |
| k <sub>p 3</sub>                 | 42.0    | 9.89    | 1.08    |
| R <sup>2</sup>                   | 0.909   | 0.984   | 0.996   |
| 200                              |         |         |         |
| C                                | 10.4    | 185     | 218     |
| k <sub>ip 4</sub>                | 50.0    | 3.77    | 0.525   |
| R <sup>2</sup>                   | 0.938   | 0.696   | 0.784   |

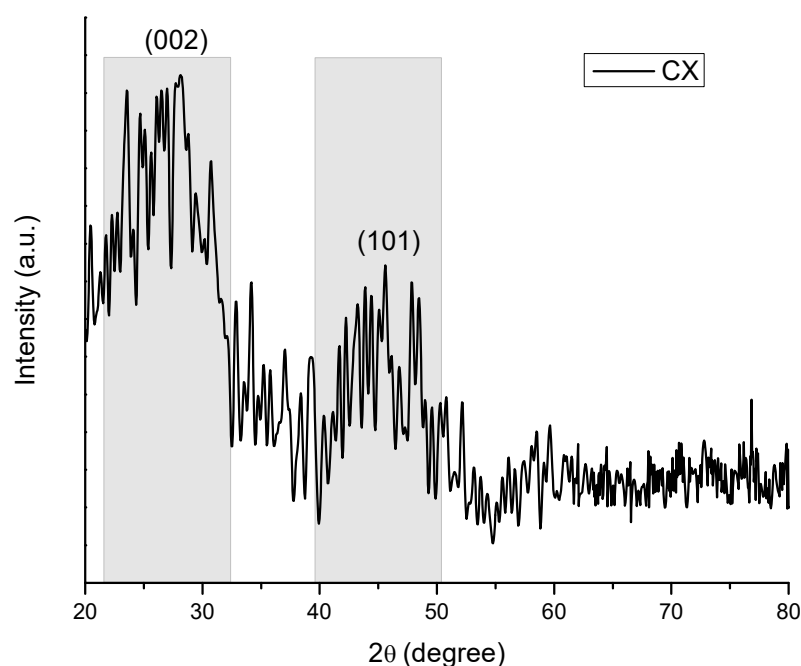

**Figure S1.** X-ray diffraction (XRD) spectrum of Carbon Xerogel (CX) indicating two broad diffraction peaks of CX at  $2\theta = 24^\circ$  and  $2\theta = 44^\circ$ , represented by highlighted region in light grey. These findings are similar to previously described XRD pattern obtained for CX derived from resorcinol-formaldehyde [46,47].

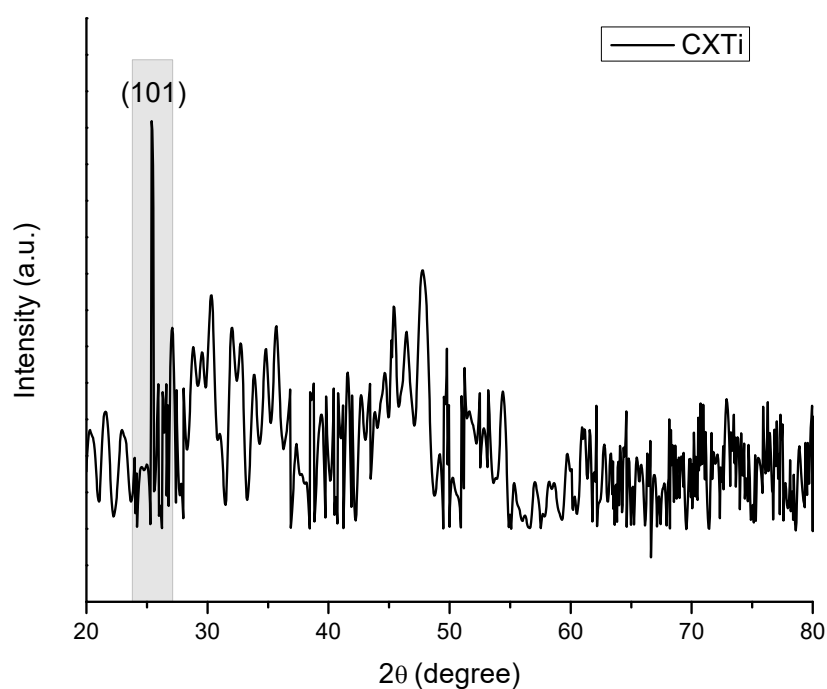

**Figure S2.** X-ray diffraction spectrum of Carbon Xerogel/TiO<sub>2</sub> (CXTi) indicating the presence of anatase phase at  $2\theta = 25^\circ$ , represented by highlighted region light grey. These findings are similar to previously described carbon/titania systems [48].
